# Supplementary material for: Catholyte-free electroreduction of CO2 for sustainable production of CO: concept, process development, techno-economic analysis, and CO2 reduction assessment
Source: Royal Society of Chemistry journal article supplement (doi:10.1039/d0gc02969f), 2021-01-01
Supplement: d0gc02969f1.pdf [file d0gc02969f1.pdf]

Electronic Supplementary Information

## **Catholyte-free electroreduction of CO<sub>2</sub> for sustainable production of CO: Concept, process development, techno-economic analysis, and CO<sub>2</sub> reduction assessment**

Jaeseo Lee<sup>a,†</sup>, Wonhee Lee<sup>b,†</sup>, Kyung Hwan Ryu<sup>c</sup>, Joungho Park<sup>b</sup>, Hyojin Lee<sup>b</sup>, Jay H. Lee<sup>a,\*</sup>, Ki Tae Park<sup>b,\*</sup>

<sup>a</sup> Department of Chemical and Biomolecular Engineering, Korea Advanced Institute of Science and Technology, 291 Daehak-ro, Yuseong, Daejeon, 34141, Republic of Korea

<sup>b</sup> Korea Institute of Energy Research, Gajeong-ro 152, Yuseong, Daejeon, 34129, Republic of Korea

<sup>c</sup> Department of Chemical Engineering, Suncheon National University, 225 Jungang-ro, Suncheon, Jeollanam-do, 57922, Republic of Korea

\* Corresponding author, TEL: +82-42-350-3926, FAX: +82-42-350-3926, E-mail: jayhlee@kaist.ac.kr

\* Corresponding author, TEL: +82-42-860-3257, FAX: +82-42-860-3134, E-mail: ktpark@kier.re.kr

### **Table of Contents**

|                                                                                                             |    |
|-------------------------------------------------------------------------------------------------------------|----|
| 1. Construction of full flow cells for the CF-ECO <sub>2</sub> R and GDE-catholyte systems .....            | 2  |
| 2. Combination of 3-stage membrane and oxy-combustion process (Case 1) .....                                | 3  |
| 3. Combination of 3-stage membrane and amine-based CO <sub>2</sub> capture process (Case 2) .....           | 6  |
| 4. Combination of amine-based CO <sub>2</sub> capture process and H <sub>2</sub> PSA process (Case 3) ..... | 9  |
| 5. Mathematical model for the CF-ECO <sub>2</sub> R process .....                                           | 12 |
| 6. CO <sub>2</sub> lifecycle assessment method .....                                                        | 16 |
| 7. Techno-economic analysis method .....                                                                    | 18 |
| 8. Simulation result .....                                                                                  | 20 |
| 9. References .....                                                                                         | 21 |

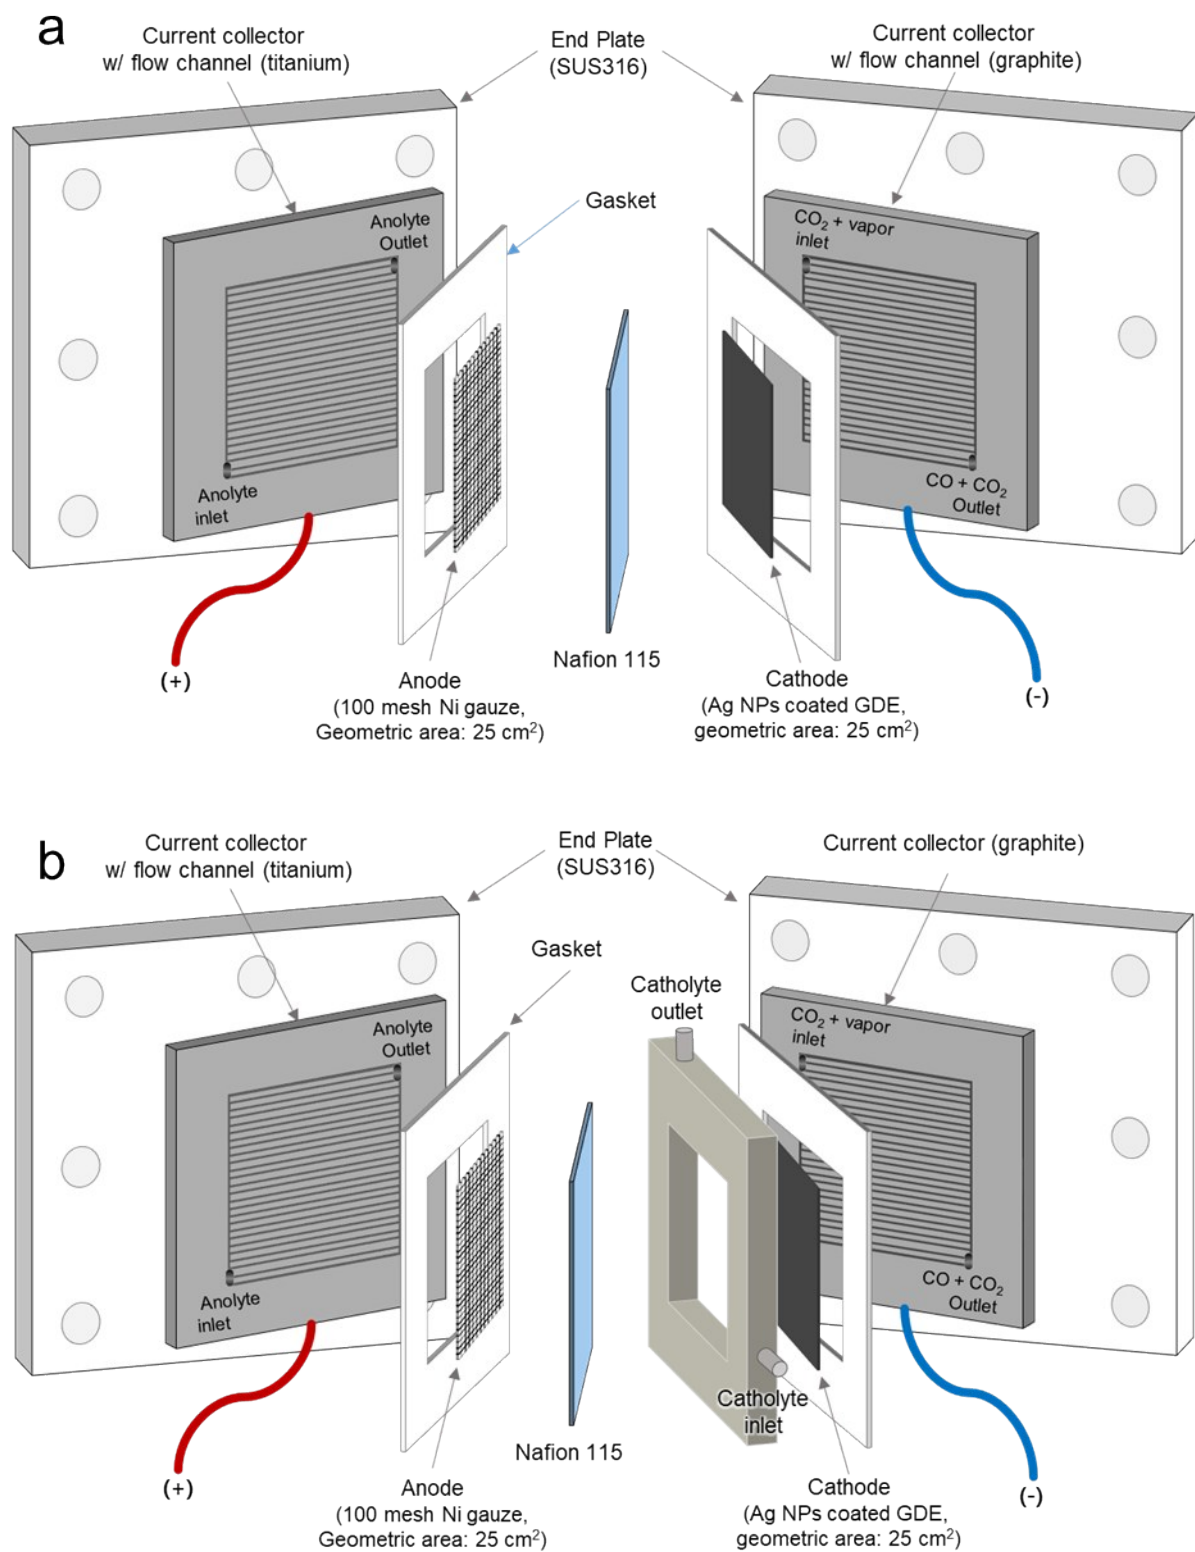

**1. Construction of full flow cells for the CF-ECO<sub>2</sub>R and GDE-catholyte systems**

**Fig. S1.** Construction of a full flow cell for a) the CF-ECO<sub>2</sub>R and b) GDE-catholyte systems.



**Table S1.** Stream table (Case 1)

|                  | Units   | <b>1</b>  | <b>2</b>  | <b>3</b>  | <b>4</b>  | <b>5</b>  | <b>6</b>  | <b>7</b>  | <b>8</b>    | <b>9</b>  | <b>10</b> |
|------------------|---------|-----------|-----------|-----------|-----------|-----------|-----------|-----------|-------------|-----------|-----------|
| Temperature      | C       | 100       | 126.7     | 89        | 89        | 89        | 40        | 40        | 40          | 90        | 90        |
| Pressure         | bar     | 1         | 1.28      | 1         | 1.5       | 1         | 1         | 1         | 1           | 1         | 1         |
| Mass flow rate   | kg/hr   | 140,368   | 140,368   | 168,464   | 3,645,763 | 3,645,763 | 3,814,227 | 118,840   | 3,695,387   | 3,695,387 | 63,172    |
| Mole flow rate   | kmol/hr | 3,282     | 3,282     | 4,841     | 202,370   | 202,370   | 208,108   | 3,679     | 204,430     | 204,430   | 2,846     |
| Volume flow rate | L/sec   | 28,280    | 23,676    | 45,041    | 1,089     | 1,089     | 44,093    | 29,156    | 10,009      | 24,953    | 23,867    |
| Mass flow rate   |         |           |           |           |           |           |           |           |             |           |           |
| H <sub>2</sub> O | kg/hr   | 2,807     | 2,807     | 30,904    | 3,645,763 | 3,645,763 | 3,675,650 | 8,951     | 3,666,699   | 3,666,699 | 35,925    |
| CO               | kg/hr   | 0         | 0         | 0         | 0         | 0         | 48,645    | 48,645    | 0           | 0         | 0         |
| CO <sub>2</sub>  | kg/hr   | 137,561   | 137,561   | 137,561   | 0         | 0         | 61,131    | 61,131    | 0           | 0         | 0         |
| H <sub>2</sub>   | kg/hr   | 0         | 0         | 0         | 0         | 0         | 114       | 114       | 0           | 0         | 0         |
| O <sub>2</sub>   | kg/hr   | 0         | 0         | 0         | 0         | 0         | 28,688    | 0         | 28,688      | 28,688    | 27,248    |
|                  | Units   | <b>11</b> | <b>12</b> | <b>13</b> | <b>14</b> | <b>15</b> | <b>16</b> | <b>17</b> | <b>18</b>   | <b>19</b> | <b>20</b> |
| Temperature      | C       | 90        | 30        | 30        | 30        | 40        | 40        | 40        | 149.1       | 25        | 25        |
| Pressure         | bar     | 1         | 1         | 1         | 1         | 1         | 1         | 1         | 2.5         | 2.5       | 2.5       |
| Mass flow rate   | kg/hr   | 3,632,215 | 63,172    | 27,853    | 35,319    | 118,840   | 114,382   | 4,458     | 114,382     | 114,382   | 110,390   |
| Mole flow rate   | kmol/hr | 201,583   | 2,846     | 887       | 1,959     | 3,679     | 3,433     | 245,781   | 3,433       | 3,433     | 3,217     |
| Volume flow rate | L/sec   | 1,086     | 6,219     | 6,209     | 10        | 29,156    | 24,830    | 1         | 13,392      | 8,862     | 8,861     |
| Mass flow rate   |         |           |           |           |           |           |           |           |             |           |           |
| H <sub>2</sub> O | kg/hr   | 3,630,775 | 35,925    | 678       | 35,247    | 8,951     | 4,546     | 4,406     | 4,546       | 4,546     | 722       |
| CO               | kg/hr   | 0         | 0         | 0         | 0         | 48,645    | 48,641    | 3         | 48,641      | 48,641    | 48,632    |
| CO <sub>2</sub>  | kg/hr   | 0         | 0         | 0         | 0         | 61,131    | 61,082    | 49        | 61,082      | 61,082    | 60,923    |
| H <sub>2</sub>   | kg/hr   | 0         | 0         | 0         | 0         | 114       | 114       | 0         | 114         | 114       | 114       |
| O <sub>2</sub>   | kg/hr   | 1,440     | 27,248    | 27,125    | 72        | 0         | 0         | 0         | 0           | 0         | 0         |
|                  | Units   | <b>21</b> | <b>22</b> | <b>23</b> | <b>24</b> | <b>25</b> | <b>26</b> | <b>27</b> | <b>27-1</b> | <b>28</b> | <b>29</b> |
| Temperature      | C       | 25        | 161.4     | 25        | 25        | 25        | 25        | 25        | 25          | 31.7      | 25        |
| Pressure         | bar     | 2.5       | 8         | 8         | 8         | 8         | 8         | 8         | 1           | 1         | 8         |
| Mass flow rate   | kg/hr   | 3,992     | 110,390   | 110,390   | 109,808   | 582       | 47,822    | 61,986    | 61,986      | 9,032     | 32,301    |
| Mole flow rate   | kmol/hr | 216       | 3,217     | 3,217     | 3,187     | 30        | 1,595     | 1,592     | 1,592       | 492       | 1,136     |

|                  |         |           |             |           |           |             |           |           |           |           |        |
|------------------|---------|-----------|-------------|-----------|-----------|-------------|-----------|-----------|-----------|-----------|--------|
| Volume flow rate | L/sec   | 1         | 4,036       | 2,743     | 2,743     | 0           | 1,373     | 1,364     | 10,779    | 17        | 978    |
| Mass flow rate   |         |           |             |           |           |             |           |           |           |           |        |
| H <sub>2</sub> O | kg/hr   | 3,824     | 722         | 722       | 214       | 507         | 0         | 214       | 214       | 8,737     | 0      |
| CO               | kg/hr   | 9         | 48,632      | 48,632    | 48,628    | 4           | 38,805    | 9,823     | 9,823     | 16        | 30,967 |
| CO <sub>2</sub>  | kg/hr   | 159       | 60,923      | 60,923    | 60,852    | 71          | 9,006     | 51,846    | 51,846    | 279       | 1,333  |
| H <sub>2</sub>   | kg/hr   | 0         | 114         | 114       | 114       | Trace       | 11        | 103       | 103       | 0         | 1      |
| O <sub>2</sub>   | kg/hr   | 0         | 0           | 0         | 0         | 0           | 0         | 0         | 0         | 0         | 0      |
|                  | Units   | <b>30</b> | <b>30-1</b> | <b>31</b> | <b>32</b> | <b>32-1</b> | <b>33</b> | <b>34</b> | <b>35</b> | <b>37</b> |        |
| Temperature      | C       | 25        | 25          | 2         | 25        | 25          | 21.5      | 30        | 30        | 25        |        |
| Pressure         | bar     | 8         | 1           | 8         | 8         | 1           | 1         | 1         | 1         | 1         |        |
| Mass flow rate   | kg/hr   | 15,522    | 15,522      | 24,909    | 7,392     | 7,392       | 84,899    | 14,926    | 12,927    | 99,825    |        |
| Mole flow rate   | kmol/hr | 459       | 459         | 887       | 250       | 250         | 2,300     | 475       | 412       | 2,320     |        |
| Volume flow rate | L/sec   | 395       | 3,161       | 763       | 215       | 1,719       | 15,652    | 3,328     | 2,882     | 15,978    |        |
| Mass flow rate   |         |           |             |           |           |             |           |           |           |           |        |
| H <sub>2</sub> O | kg/hr   | 0         | 0           | 0         | 0         | 0           | 214       | 363       | 315       | 1,593     |        |
| CO               | kg/hr   | 7,839     | 7,839       | 24,711    | 6,255     | 6,255       | 23,917    | 0         | 0         | 0         |        |
| CO <sub>2</sub>  | kg/hr   | 7,673     | 7,673       | 197       | 1,136     | 1,136       | 60,654    | 0         | 0         | 98,232    |        |
| H <sub>2</sub>   | kg/hr   | 10        | 10          | 0         | 1         | 1           | 114       | 0         | 0         | 0         |        |
| O <sub>2</sub>   | kg/hr   | 0         | 0           | 0         | 0         | 0           | 0         | 14,563    | 12,613    | 0         |        |

### 3. Combination of 3-stage membrane and amine-based CO<sub>2</sub> absorption process (Case 2)

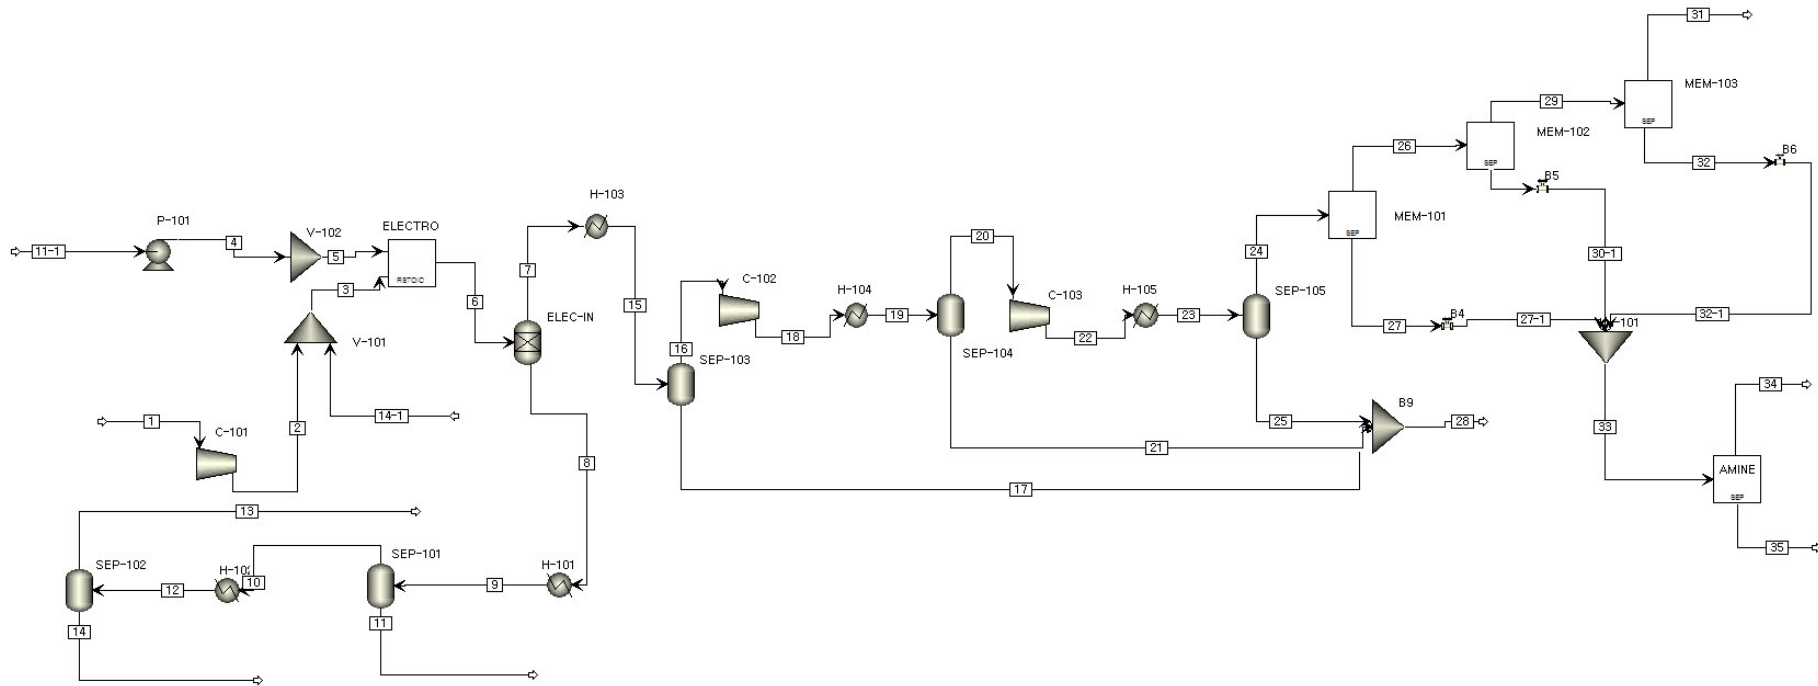

**Fig. S3.** Detailed system configuration of Case 2: combination of 3-stage membrane and amine-based CO<sub>2</sub> absorption process.

**Table S2.** Stream table (Case 2)

|                  | Units   | <b>1</b>  | <b>2</b>  | <b>3</b>  | <b>4</b>  | <b>5</b>  | <b>6</b>  | <b>7</b>  | <b>8</b>    | <b>9</b>  | <b>10</b> |
|------------------|---------|-----------|-----------|-----------|-----------|-----------|-----------|-----------|-------------|-----------|-----------|
| Temperature      | C       | 100       | 126.7     | 89        | 89        | 89        | 40        | 40        | 40          | 90        | 90        |
| Pressure         | bar     | 1         | 1.28      | 1         | 1.5       | 1         | 1         | 1         | 1           | 1         | 1         |
| Mass flow rate   | kg/hr   | 140,368   | 140,368   | 168,464   | 3,645,763 | 3,645,763 | 3,814,227 | 118,840   | 3,695,387   | 3,695,387 | 63,172    |
| Mole flow rate   | kmol/hr | 3,282     | 3,282     | 4,841     | 202,370   | 202,370   | 208,108   | 3,679     | 204,430     | 204,430   | 2,846     |
| Volume flow rate | L/sec   | 28,280    | 23,676    | 45,041    | 1,089     | 1,089     | 44,093    | 29,156    | 10,009      | 24,953    | 23,867    |
| Mass flow rate   |         |           |           |           |           |           |           |           |             |           |           |
| H <sub>2</sub> O | kg/hr   | 2,807     | 2,807     | 30,904    | 3,645,763 | 3,645,763 | 3,675,650 | 8,951     | 3,666,699   | 3,666,699 | 35,925    |
| CO               | kg/hr   | 0         | 0         | 0         | 0         | 0         | 48,645    | 48,645    | 0           | 0         | 0         |
| CO <sub>2</sub>  | kg/hr   | 137,561   | 137,561   | 137,561   | 0         | 0         | 61,131    | 61,131    | 0           | 0         | 0         |
| H <sub>2</sub>   | kg/hr   | 0         | 0         | 0         | 0         | 0         | 114       | 114       | 0           | 0         | 0         |
| O <sub>2</sub>   | kg/hr   | 0         | 0         | 0         | 0         | 0         | 28,688    | 0         | 28,688      | 28,688    | 27,248    |
|                  | Units   | <b>11</b> | <b>12</b> | <b>13</b> | <b>14</b> | <b>15</b> | <b>16</b> | <b>17</b> | <b>18</b>   | <b>19</b> | <b>20</b> |
| Temperature      | C       | 90        | 30        | 30        | 30        | 40        | 40        | 40        | 149.1       | 25        | 25        |
| Pressure         | bar     | 1         | 1         | 1         | 1         | 1         | 1         | 1         | 2.5         | 2.5       | 2.5       |
| Mass flow rate   | kg/hr   | 3,632,215 | 63,172    | 27,853    | 35,319    | 118,840   | 114,382   | 4,458     | 114,382     | 114,382   | 110,390   |
| Mole flow rate   | kmol/hr | 201,583   | 2,846     | 887       | 1,959     | 3,679     | 3,433     | 245,781   | 3,433       | 3,433     | 3,217     |
| Volume flow rate | L/sec   | 1,086     | 6,219     | 6,209     | 10        | 29,156    | 24,830    | 1         | 13,392      | 8,862     | 8,861     |
| Mass flow rate   |         |           |           |           |           |           |           |           |             |           |           |
| H <sub>2</sub> O | kg/hr   | 3,630,775 | 35,925    | 678       | 35,247    | 8,951     | 4,546     | 4,406     | 4,546       | 4,546     | 722       |
| CO               | kg/hr   | 0         | 0         | 0         | 0         | 48,645    | 48,641    | 3         | 48,641      | 48,641    | 48,632    |
| CO <sub>2</sub>  | kg/hr   | 0         | 0         | 0         | 0         | 61,131    | 61,082    | 49        | 61,082      | 61,082    | 60,923    |
| H <sub>2</sub>   | kg/hr   | 0         | 0         | 0         | 0         | 114       | 114       | 0         | 114         | 114       | 114       |
| O <sub>2</sub>   | kg/hr   | 1,440     | 27,248    | 27,125    | 72        | 0         | 0         | 0         | 0           | 0         | 0         |
|                  | Units   | <b>21</b> | <b>22</b> | <b>23</b> | <b>24</b> | <b>25</b> | <b>26</b> | <b>27</b> | <b>27-1</b> | <b>28</b> | <b>29</b> |
| Temperature      | C       | 25        | 161.4     | 25        | 25        | 25        | 25        | 25        | 25          | 31.7      | 25        |
| Pressure         | bar     | 2.5       | 8         | 8         | 8         | 8         | 8         | 8         | 1           | 1         | 8         |
| Mass flow rate   | kg/hr   | 3,992     | 110,390   | 110,390   | 109,808   | 582       | 47,822    | 61,986    | 61,986      | 9,032     | 32,301    |
| Mole flow rate   | kmol/hr | 216       | 3,217     | 3,217     | 3,187     | 30        | 1,595     | 1,592     | 1,592       | 492       | 1,136     |



|                  |         |           |             |           |           |             |           |           |           |       |        |
|------------------|---------|-----------|-------------|-----------|-----------|-------------|-----------|-----------|-----------|-------|--------|
| Volume flow rate | L/sec   | 1         | 4,036       | 2,743     | 2,743     | 0           | 1,373     | 1,364     | 10,779    | 17    | 978    |
| Mass flow rate   |         |           |             |           |           |             |           |           |           |       |        |
| H <sub>2</sub> O | kg/hr   | 3,824     | 722         | 722       | 214       | 507         | 0         | 214       | 214       | 8,737 | 0      |
| CO               | kg/hr   | 9         | 48,632      | 48,632    | 48,628    | 4           | 38,805    | 9,823     | 9,823     | 16    | 30,967 |
| CO <sub>2</sub>  | kg/hr   | 159       | 60,923      | 60,923    | 60,852    | 71          | 9,006     | 51,846    | 51,846    | 279   | 1,333  |
| H <sub>2</sub>   | kg/hr   | 0         | 114         | 114       | 114       | Trace       | 11        | 103       | 103       | 0     | 1      |
| O <sub>2</sub>   | kg/hr   | 0         | 0           | 0         | 0         | 0           | 0         | 0         | 0         | 0     | 0      |
|                  | Units   | <b>30</b> | <b>30-1</b> | <b>31</b> | <b>32</b> | <b>32-1</b> | <b>33</b> | <b>34</b> | <b>35</b> |       |        |
| Temperature      | C       | 25        | 25          | 2         | 25        | 25          | 21.5      | 40        | 60        |       |        |
| Pressure         | bar     | 8         | 1           | 8         | 8         | 1           | 1         | 2         | 1         |       |        |
| Mass flow rate   | kg/hr   | 15,522    | 15,522      | 24,909    | 7,392     | 7,392       | 84,899    | 60,059    | 24,840    |       |        |
| Mole flow rate   | kmol/hr | 459       | 459         | 887       | 250       | 250         | 2,300     | 1,365     | 935       |       |        |
| Volume flow rate | L/sec   | 395       | 3,161       | 763       | 215       | 1,719       | 15,652    | 4,936     | 7,196     |       |        |
| Mass flow rate   |         |           |             |           |           |             |           |           |           |       |        |
| H <sub>2</sub> O | kg/hr   | 0         | 0           | 0         | 0         | 0           | 214       | 11        | 203       |       |        |
| CO               | kg/hr   | 7,839     | 7,839       | 24,711    | 6,255     | 6,255       | 23,917    | 0         | 23,917    |       |        |
| CO <sub>2</sub>  | kg/hr   | 7,673     | 7,673       | 197       | 1,136     | 1,136       | 60,654    | 60,048    | 607       |       |        |
| H <sub>2</sub>   | kg/hr   | 10        | 10          | 0         | 1         | 1           | 114       | 0         | 114       |       |        |
| O <sub>2</sub>   | kg/hr   | 0         | 0           | 0         | 0         | 0           | 0         | 0         | 0         |       |        |

#### 4. Combination of amine-based CO<sub>2</sub> absorption process and H<sub>2</sub> PSA processes (Case 3)

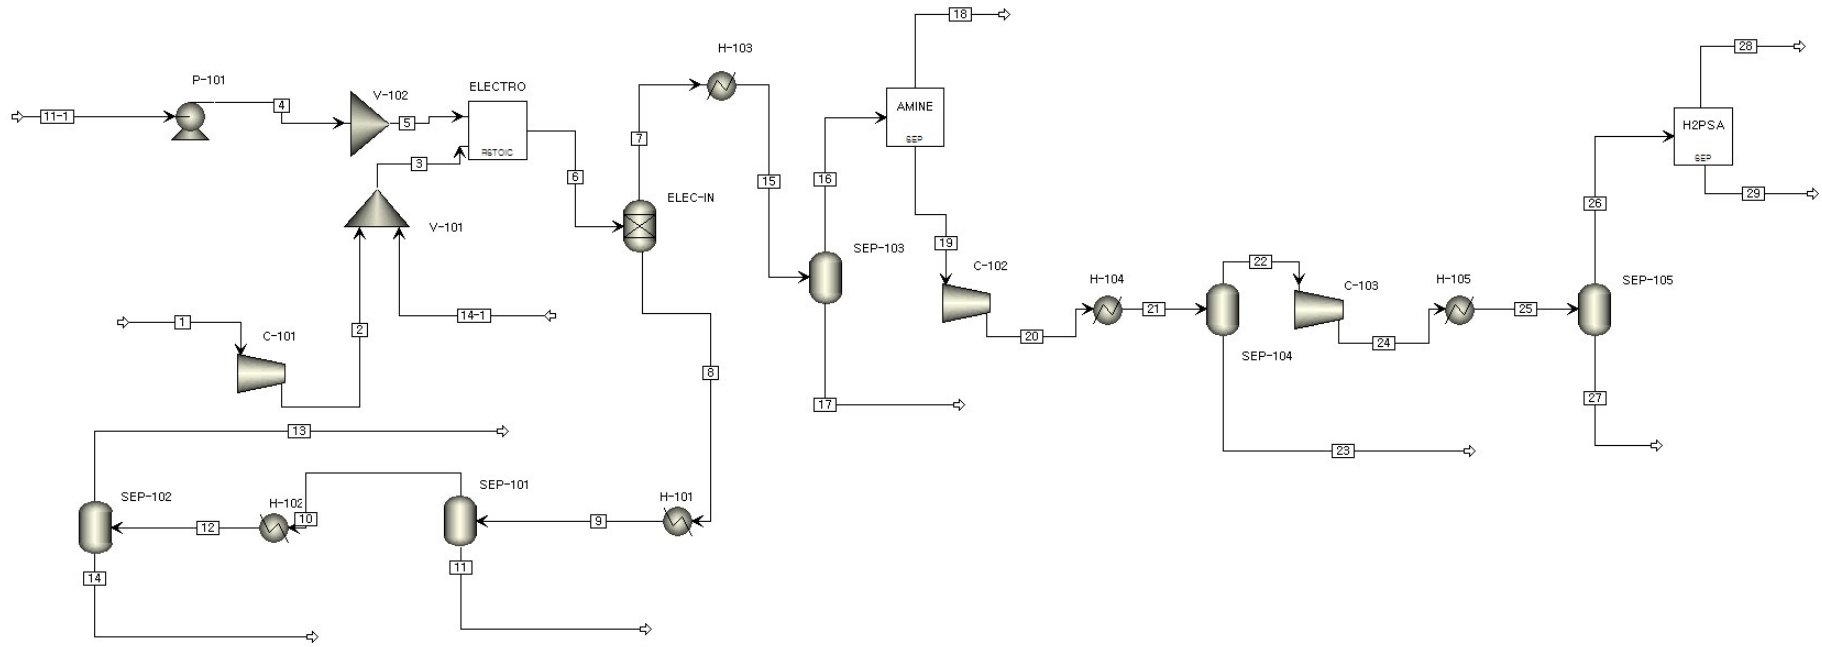

**Fig. S4.** Detailed system configuration of Case 3: combination of amine-based CO<sub>2</sub> absorption process and H<sub>2</sub> pressure swing adsorption.

**Table S3.** Stream table (Case 3)

|                  | Units   | <b>1</b>  | <b>2</b>  | <b>3</b>  | <b>4</b>  | <b>5</b>  | <b>6</b>  | <b>7</b>  | <b>8</b>  | <b>9</b>  | <b>10</b> |
|------------------|---------|-----------|-----------|-----------|-----------|-----------|-----------|-----------|-----------|-----------|-----------|
| Temperature      | C       | 100       | 126.7     | 89        | 89        | 89        | 40        | 40        | 40        | 90        | 90        |
| Pressure         | bar     | 1         | 1.28      | 1         | 1.5       | 1         | 1         | 1         | 1         | 1         | 1         |
| Mass flow rate   | kg/hr   | 71,545    | 71,545    | 85,866    | 1,858,230 | 1,858,230 | 1,944,095 | 60,572    | 1,883,523 | 1,883,523 | 32,199    |
| Mole flow rate   | kmol/hr | 1,673     | 1,673     | 2,468     | 103,147   | 103,147   | 106,072   | 1,875     | 104,197   | 104,197   | 1,450     |
| Volume flow rate | L/sec   | 14,414    | 12,068    | 22,957    | 555       | 555       | 14,091    | 12,656    | 3,273     | 12,718    | 12,165    |
| Mass flow rate   | kg/hr   |           |           |           |           |           |           |           |           |           |           |
| H <sub>2</sub> O | kg/hr   | 1,431     | 1,431     | 15,752    | 1,858,230 | 1,858,230 | 1,873,463 | 4,562     | 1,868,901 | 1,868,901 | 18,311    |
| CO               | kg/hr   | 0         | 0         | 0         | 0         | 0         | 24,794    | 24,794    | 0         | 0         | 0         |
| CO <sub>2</sub>  | kg/hr   | 70,114    | 70,114    | 70,114    | 0         | 0         | 31,158    | 31,158    | 0         | 0         | 0         |
| H <sub>2</sub>   | kg/hr   | 0         | 0         | 0         | 0         | 0         | 58        | 58        | 0         | 0         | 0         |
| O <sub>2</sub>   | kg/hr   | 0         | 0         | 0         | 0         | 0         | 14,622    | 0         | 14,622    | 14,622    | 13,888    |
|                  | Units   | <b>11</b> | <b>12</b> | <b>13</b> | <b>14</b> | <b>15</b> | <b>16</b> | <b>17</b> | <b>18</b> | <b>19</b> | <b>20</b> |
| Temperature      | C       | 90        | 30        | 30        | 30        | 40        | 40        | 40        | 40        | 60        | 194       |
| Pressure         | bar     | 1         | 1         | 1         | 1         | 1         | 1         | 1         | 2         | 1         | 2.5       |
| Mass flow rate   | kg/hr   | 1,851,324 | 32,199    | 14,197    | 18,002    | 60,572    | 58,300    | 2,272     | 31,108    | 27,192    | 27,192    |
| Mole flow rate   | kmol/hr | 102,746   | 1,450     | 452       | 998       | 1,875     | 1,750     | 125       | 707       | 1,043     | 1,043     |
| Volume flow rate | L/sec   | 554       | 3,170     | 3,165     | 5         | 12,656    | 12,656    | 1         | 2,557     | 8,024     | 4,5014    |
| Mass flow rate   | kg/hr   |           |           |           |           |           |           |           |           |           |           |
| H <sub>2</sub> O | kg/hr   | 1,850,590 | 18,311    | 346       | 17,965    | 4,562     | 2,317     | 2,246     | 6         | 2,311     | 2,311     |
| CO               | kg/hr   | 0         | 0         | 0         | 0         | 24,794    | 24,792    | 2         | 0         | 24,792    | 24,792    |
| CO <sub>2</sub>  | kg/hr   | 0         | 0         | 0         | 0         | 31,158    | 31,133    | 25        | 31,102    | 31        | 31        |
| H <sub>2</sub>   | kg/hr   | 0         | 0         | 0         | 0         | 58        | 58        | 0         | 0         | 58        | 58        |
| O <sub>2</sub>   | kg/hr   | 734       | 13,888    | 13,851    | 37        | 0         | 0         | 0         | 0         | 0         | 0         |
|                  | Units   | <b>21</b> | <b>22</b> | <b>23</b> | <b>24</b> | <b>25</b> | <b>26</b> | <b>27</b> | <b>28</b> | <b>29</b> |           |
| Temperature      | C       | 25        | 25        | 25        | 141.8     | 25        | 25        | 25        | 25        | 25        |           |
| Pressure         | bar     | 2.5       | 2.5       | 2.5       | 6         | 6         | 6         | 6         | 6         | 6         |           |
| Mass flow rate   | kg/hr   | 27,192    | 25,084    | 2,109     | 25,084    | 25,084    | 24,958    | 125       | 49        | 24,909    |           |
| Mole flow rate   | kmol/hr | 1,043     | 926       | 117       | 926       | 926       | 919       | 7         | 24        | 895       |           |

|                  |       |        |        |       |        |        |        |     |    |        |
|------------------|-------|--------|--------|-------|--------|--------|--------|-----|----|--------|
| Volume flow rate | L/sec | 2,551  | 2,550  | 1     | 1,479  | 1,055  | 1,055  | 0   | 28 | 1,027  |
| Mass flow rate   |       |        |        |       |        |        |        |     |    |        |
| H <sub>2</sub> O | kg/hr | 2,311  | 211    | 2,100 | 211    | 211    | 87     | 124 | 0  | 87     |
| CO               | kg/hr | 24,792 | 24,784 | 9     | 24,784 | 24,784 | 24,782 | 1   | 0  | 24,782 |
| CO <sub>2</sub>  | kg/hr | 31     | 31     | 0     | 31     | 31     | 31     | 0   | 0  | 31     |
| H <sub>2</sub>   | kg/hr | 58     | 58     | 0     | 58     | 58     | 58     | 0   | 49 | 9      |
| O <sub>2</sub>   | kg/hr | 0      | 0      | 0     | 0      | 0      | 0      | 0   | 0  | 0      |

## 5. Mathematical model for the CF-ECO<sub>2</sub>R process

Mathematical model for the CF-ECO<sub>2</sub>R process is referred from published studies.<sup>1-3</sup> The modeling assumptions are summarized as follows:<sup>3,4</sup>

1. Molar transport phenomena are dominant in the length direction, whereas they are negligible in the directions of cell width and height. Therefore, the model is developed in one dimension to reduce the computational time.
2. Isothermal conditions as validated in the experiments, due to the excess of CO<sub>2</sub> gas and the small cell dimensions.
3. The kinetic rates of the electrochemical reactions can be described by the Butler-Volmer equation, which has been widely used to describe the kinetics of electrochemical reactions.
4. The catalyst layer is treated as an infinitely thin film interface in contact with the electrolyte.
5. Mass transfer limitation is assumed not to play significant role at the current density. The catholyte solution is saturated with CO<sub>2</sub>.

The species transport equations are mathematically described by the Nernst-Planck equation.<sup>3,4</sup>

$$\nabla \cdot N_i = R_i \quad \backslash * \text{ MERGEFORMAT (1)}$$

$$N_i = -D_i \nabla C_i - z_i u_{mi} F C_i \nabla \Phi + u C_i \quad \backslash * \text{ MERGEFORMAT (2)}$$

$$u_{mi} = \frac{D_i}{RT} \quad \backslash * \text{ MERGEFORMAT (3)}$$

where  $N_i$  is the species molar flux ( $mol\cdot m^{-2}\cdot s^{-1}$ );  $R_i$  is the reaction rate term of species  $i$ ;  $D_i$  is the diffusion coefficient of species  $i$  ( $m^2\cdot s^{-1}$ );  $C_i$  is the molar concentration of species  $i$  ( $mol\cdot m^{-3}$ );  $z_i$  is the species charge of species  $i$ ;  $u_{mi}$  is the species mobility of species  $i$  ( $mol\cdot m^2\cdot s^{-1}\cdot V^{-1}\cdot C^{-1}$ );  $F$  is the Faradaic constant ( $96,485C\cdot mol^{-1}$ );  $\Phi$  is the cell potential ( $V$ );  $u$  is the velocity ( $m\cdot s^{-1}$ ).

The electric potential equation is described as follows:<sup>2-4</sup>

$$\sigma \nabla^2 \Phi = S_\phi \quad \backslash * \text{MERGEFORMAT (4)}$$

$$S_\phi = \frac{A_{cell}}{V_{cell}} \sum j_i \quad \backslash * \text{MERGEFORMAT (5)}$$

where  $\sigma$  is the electric conductivity ( $S\cdot m^{-1}$ );  $S_\phi$  is the sink term in the charge equation;  $A_{cell}$  is the area of the computational cell ( $m^2$ );  $V_{cell}$  is the volume of the computational cell ( $m^3$ );  $j_i$  is the current density for species  $i$  ( $A\cdot m^{-2}$ ).

The reaction kinetics is described by the Butler-Volmer equation.<sup>1-4</sup>

$$j_i = j_{0,i} \left\{ \frac{C_O^{surface}}{C_O^{bulk}} \exp \left[ \frac{\alpha_{an,i} n F \eta_i}{RT} \right] - \frac{C_R^{surface}}{C_R^{bulk}} \exp \left[ -\frac{\alpha_{ca,i} n F \eta_i}{RT} \right] \right\} \quad \backslash * \text{MERGEFORMAT (6)}$$

where  $j_i$  is the electrode current density of reaction  $i$  ( $mA\cdot cm^{-2}$ );  $j_{0,i}$  is the exchange current density of reaction  $i$  ( $mA\cdot cm^{-2}$ );  $C_O^{surface}$  and  $C_R^{surface}$  are the electrode's surface concentration

of the species to be oxidized and to be reduced, respectively;  $C_O^{bulk}$  and  $C_R^{bulk}$  are the bulk concentration of the species to be oxidized and to be reduced, respectively;  $n$  is the electron transfer number of the rate-determining step;  $\alpha_{an,i}$  and  $\alpha_{ca,i}$  are the anodic and cathodic charge transfer coefficient of reaction  $i$ , respectively;  $R$  is the universal gas constant ( $= 8.314 JK^{-1} mol^{-1}$ );  $F$  is the Faraday constant ( $= 96485 C mol^{-1}$ );  $T$  is the temperature ( $K$ );  $\eta_i$  is the electrode overpotential of reaction  $i$  ( $V$ ).

The reaction rate  $R_i$  is described as follows:

$$r_{ij} = \frac{\nu_{ij} j_i}{z_j F} \quad \backslash * \text{MERGEFORMAT (7)}$$

$$R_j = \sum_i r_{ij} \quad \backslash * \text{MERGEFORMAT (8)}$$

where  $r_{ij}$  is the reaction of species  $j$  in reaction  $i$ ;  $\nu_{ij}$  is the stoichiometry of species  $j$  in the electrochemical reaction  $i$ .

**Table S4** Estimated values of key model parameters of the CF-ECO<sub>2</sub>R process

| Notation        | Estimated value | Unit               |
|-----------------|-----------------|--------------------|
| $\alpha_{rxn3}$ | 0.10            | V                  |
| $\alpha_{rxn4}$ | 0.09            | V                  |
| $j_{0,rxn3}$    | 85.6            | mAcm <sup>-2</sup> |
| $j_{0,rxn4}$    | 0.20            | mAcm <sup>-2</sup> |

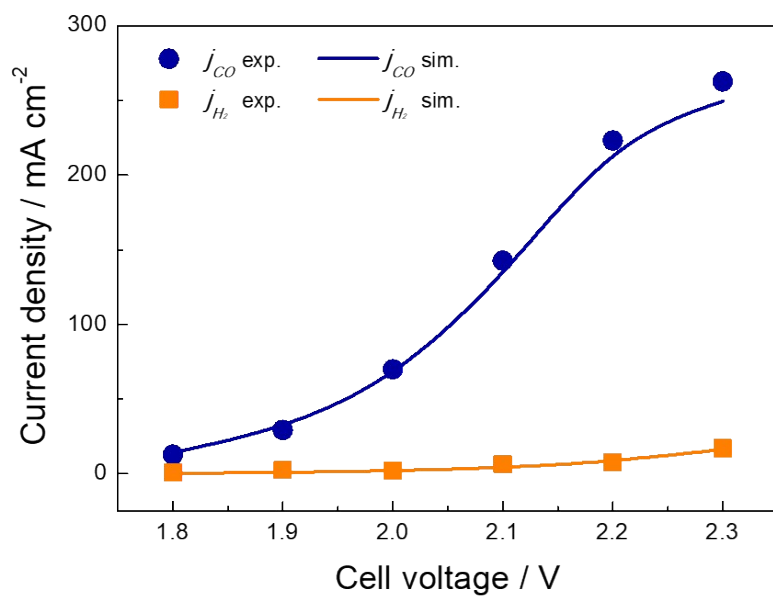

**Fig. S5.** Verification of the CF-ECO<sub>2</sub>R model against experimental data.



## 6. CO<sub>2</sub> lifecycle assessment method

Lifecycle assessment (LCA) is a method to evaluate and analyze the environmental influences of products and processes taking into consideration their system boundaries and set functional unit. The CO<sub>2</sub> LCA is described by estimating the direct and indirect CO<sub>2</sub> emission and net CO<sub>2</sub> emission, which is calculated by the direct and indirect CO<sub>2</sub> emission.<sup>5-7</sup>

$$F_{CO_2}^{D/I} = F_i \cdot GWP_i \quad \backslash * \text{ MERGEFORMAT (9)}$$

$$E_{CO_2}^D = \sum \frac{F_{CO_2}^D}{F_p} \quad \backslash * \text{ MERGEFORMAT (10)}$$

$$E_{CO_2}^I = \sum \frac{F_{CO_2}^I}{F_p} \quad \backslash * \text{ MERGEFORMAT (11)}$$

$$E_{CO_2}^C = \sum \frac{F_{CO_2}^C}{F_p} \quad \backslash * \text{ MERGEFORMAT (12)}$$

$$E_{CO_2}^N = E_{CO_2}^D + E_{CO_2}^I - E_{CO_2}^C \quad \backslash * \text{ MERGEFORMAT (13)}$$

where  $F_i$  is the value of component  $i$  (e.g., raw material consumption, utility consumption, etc.) per the set function unit;  $GWP_i$  is the life cycle inventory parameter of component  $i$ ;  $E_{CO_2}^{D/I}$  is the direct/indirect CO<sub>2</sub> emission index;  $F_{CO_2}^{D/I}$  is the direct/indirect CO<sub>2</sub> emission rate;  $F_p$  is the production rate;  $E_{CO_2}^C$  is the CO<sub>2</sub> consumption index;  $F_{CO_2}^C$  is the CO<sub>2</sub> consumption rate;  $E_{CO_2}^N$  is the net CO<sub>2</sub> emission index. Using the  $E_{CO_2}^N$  value, the CO<sub>2</sub> emission effect of the CO<sub>2</sub> utilization process is evaluated.

The used life cycle inventory parameter in this study is summarized in Table S4.

**Table S5.** Life cycle inventory parameters used in this study

| Data set                   | Global warming impact (GWI) | Unit                         |
|----------------------------|-----------------------------|------------------------------|
| Electricity                |                             |                              |
| Grid mix*                  | 0.39 <sup>5</sup>           | ton CO <sub>2</sub> -eq./MWh |
| LP steam                   | 82.894 <sup>8</sup>         | kg CO <sub>2</sub> -eq./GJ   |
| Cooling water              | Neglected                   | -                            |
| Hydrogen**                 | 7.00 <sup>9</sup>           | ton CO <sub>2</sub> -eq./ton |
| CO <sub>2</sub> (captured) | -0.71 <sup>5</sup>          | ton CO <sub>2</sub> -eq./ton |

\*Electricity mix European Environment Agency (EEA).

\*\*Considered compression process. 12.00 ton CO<sub>2</sub>-eq. per ton H<sub>2</sub> via steam methane reforming.

## 7. Techno-economic analysis method

Techno-economic analysis (TEA) is a method to evaluate and analyze the techno-economic feasibility of a give process. Inside battery limits (ISBL) and outside battery limits (OSBL) method is used for the present analyses.<sup>10</sup> The annual operating cost is calculated as the sum of fixed and variable operating cost. The fixed capital investment (FCI) is estimated from the total equipment installation cost. All equipment installation costs are converted to 2019 prices in USD by considering the chemical engineering plant cost indexes (CEPCI). Capital expenditure (CAPEX) is described as following equations.

$$IEC = F_I \times FOB \quad \backslash * \text{ MERGEFORMAT (14)}$$

$$ISBL = IEC \times F_{ISBL} \quad \backslash * \text{ MERGEFORMAT (15)}$$

$$FCI = ISBL \times (1 + D \& E + X) \quad \backslash * \text{ MERGEFORMAT (16)}$$

$$OSBL = ISBL \times OS \quad \backslash * \text{ MERGEFORMAT (17)}$$

$$TPC = FCI + OSBL + WC \quad \backslash * \text{ MERGEFORMAT (18)}$$

where  $IEC$  is the installation cost;  $F_I$  is the installation factor;  $FOB$  is the equipment purchase cost;  $F_{ISBL}$  is the ISBL factor, which is calculated as the sum of piping, instrumentation and control, electrical system, civil, structure and building, and lagging and paint;  $D \& E$  is the design and engineering factor;  $X$  is the contingency factor;  $OS$  is the offsite factor;  $WC$  is the working capital;  $TPC$  is the total plant cost (CAPEX).

The estimated CAPEX is converted to annualized investment cost using following equations.

$$AIC = TPC \times CRF \quad \backslash * \text{ MERGEFORMAT (19)}$$

$$CRF = \frac{i(i+1)^n}{((i+1)^n - 1)} \quad \backslash * \text{ MERGEFORMAT (20)}$$

where  $AIC$  is the annualized investment cost;  $CRF$  is the capital recovery factor;  $i$  is the annual discount rate;  $n$  is operation time of the system.

FOB for all equipment except for electrolyzer and PSA is estimated using literature.<sup>10</sup> The used purchased prices for electrolyzer, utility and raw material in this study is summarized in Table S5.

**Table S6.** Purchase prices used in this study

| Data set                                  | Value               | Unit                          |
|-------------------------------------------|---------------------|-------------------------------|
| Electrolyzer stack cost                   | 112 <sup>11</sup>   | USD/kW                        |
| Electrolyzer BoP cost                     | 303 <sup>11</sup>   | USD/kW                        |
| Reference cost                            | 1,989,043           | USD                           |
| PSA unit <sup>12</sup> Reference capacity | 1,000               | m <sup>3</sup> /hr (flowrate) |
| Scaling factor                            | 0.7                 | -                             |
| CO <sub>2</sub> capturing cost            | 40 <sup>12</sup>    | USD/ton CO <sub>2</sub>       |
| Electricity                               | 0.066 <sup>13</sup> | USD/kWh                       |
| LP steam                                  | 6.08 <sup>7</sup>   | USD/GJ                        |
| Process water                             | 0.15 <sup>6</sup>   | USD/m <sup>3</sup>            |
| O <sub>2</sub>                            | 95 <sup>13</sup>    | USD/ton                       |
| H <sub>2</sub>                            | 8,000 <sup>14</sup> | USD/ton                       |

## 8. Simulation results

**Table S7.** Simulation results for the CF-ECO<sub>2</sub>R process. The simulation is conducted to predict the performance of the CF-ECO<sub>2</sub>R process at operating voltages from 1.8 V to 2.3 V.

| Operating voltage (V) | $j_{CO}$ ( $mAcm^{-2}$ ) | $j_{H_2}$ ( $mAcm^{-2}$ ) | $FE_{CO}$ (%) | CO <sub>2</sub> conversion (%) |
|-----------------------|--------------------------|---------------------------|---------------|--------------------------------|
| 1.8                   | 14.3                     | 0.5                       | 92.6          | 4.7                            |
| 1.9                   | 30.0                     | 1.0                       | 93.6          | 9.5                            |
| 2.0                   | 62.7                     | 2.0                       | 97.1          | 18.9                           |
| 2.1                   | 131.1                    | 4.1                       | 95.5          | 35.5                           |
| 2.2                   | 223.7                    | 8.2                       | 92.9          | 55.6                           |
| 2.3                   | 249.5                    | 16.4                      | 88.6          | 62.9                           |

## 9. References

1. X. Lu, D. Y. C. Leung, H. Z. Wang and J. Xuan, *Appl Energ*, 2018, **227**, 525-532.
2. H. Z. Wang, D. Y. C. Leung and J. Xuan, *Appl Energ*, 2013, **102**, 1057-1062.
3. Y. Kotb, S. E. K. Fateen, J. Albo and I. Ismail, *J Electrochem Soc*, 2017, **164**, E391-E400.
4. C. Georgopoulou, S. Jain, A. Agarwal, E. Rode, G. Dimopoulos, N. Sridhar and N. Kakalis, *Comput Chem Eng*, 2016, **93**, 160-170.
5. A. Sternberg, C. M. Jens and A. Bardow, *Green Chem*, 2017, **19**, 2244-2259.
6. R. Meys, A. Katelhon and A. Bardow, *Green Chem*, 2019, **21**, 3334-3342.
7. J. Lee, K. H. Ryu, H. Y. Ha, K. D. Jung and J. H. Lee, *J Co2 Util*, 2020, **37**, 113-121.
8. W. Chung, K. Roh and J. H. Lee, *Int J Greenh Gas Con*, 2018, **74**, 259-270.
9. E. Cetinkaya, I. Dincer and G. F. Naterer, *Int J Hydrogen Energ*, 2012, **37**, 2071-2080.
10. G. Towler and R. Sinnott, *Chemical engineering design: principles, practice and economics of plant and process design*, Elsevier, 2012.
11. A. T. Mayyas, M. F. Ruth, B. S. Pivovar, G. Bender and K. B. Wipke, *Manufacturing Cost Analysis for Proton Exchange Membrane Water Electrolyzers*, National Renewable Energy Lab.(NREL), Golden, CO (United States), 2019.
12. M. Jouny, W. Luc and F. Jiao, *Ind Eng Chem Res*, 2018, **57**, 2165-2177.
13. C. Hank, S. Gelpke, A. Schnabl, R. J. White, J. Full, N. Wiebe, T. Smolinka, A. Schaadt, H.-M. Henning and C. Hebling, *Sustain Energ Fuels*, 2018, **2**, 1244-1261.
14. S. Kimura and Y. Li, *ERIA Research Project Report FY2018 no.01*, ERIA, 2019, 140-183.
